# Supplementary material for: The Western United States Large Forest-Fire Stochastic Simulator (WULFFSS) 1.0: A monthly gridded forest-fire model using interpretable statistics
Source: Copernicus journal article supplement (doi:10.5194/egusphere-2025-2934), 2025-07-02
Supplement: Supplementary file 1 [file egusphere-2025-2934-supplement.pdf]

**Table S1.** Descriptions of the potential predictor variables considered in building the spatial component of the fire probability and/or size models (see Table A1).

| Number    | Name                            | Description                                                                                                                                                                                                                                                                                                                                                                                                                                                                                                                                                                                                                                                                                      |
|-----------|---------------------------------|--------------------------------------------------------------------------------------------------------------------------------------------------------------------------------------------------------------------------------------------------------------------------------------------------------------------------------------------------------------------------------------------------------------------------------------------------------------------------------------------------------------------------------------------------------------------------------------------------------------------------------------------------------------------------------------------------|
| V1_space  | connectivity                    | First calculated at 1-km resolution: For each 1-km grid cell with $\geq 10,000$ kg/ha live above-ground forest biomass, first calculate the number of consecutive adjoining grid cells in each of 8 directions radiating away from central grid cell that also have $\geq 10,000$ kg/ha live biomass. In each of the four directions radiating north, south, east, and west, we consider the 6 nearest grid cells. In each of the four diagonal directions we consider the nearest 4 grid cells. Connectivity is 1 (for the central grid cell) plus the sum of the total number of connecting $\geq 10,000$ kg/ha grid cells in all 8 directions divided by the number of grid cells considered. |
| V2_space  | connectivity_log10              | Logarithm of connectivity                                                                                                                                                                                                                                                                                                                                                                                                                                                                                                                                                                                                                                                                        |
| V3_space  | connectivity_in50kha            | First calculated at 1-km resolution: Average of connectivity across the surrounding 23x23 km box.                                                                                                                                                                                                                                                                                                                                                                                                                                                                                                                                                                                                |
| V4_space  | connectivity_in50kha_log10      | Logarithm of connectivity_in50kha                                                                                                                                                                                                                                                                                                                                                                                                                                                                                                                                                                                                                                                                |
| V5_space  | forestfrac                      | Fraction of 1-km grid cells with $\geq 10,000$ kg/ha live aboveground forest biomass                                                                                                                                                                                                                                                                                                                                                                                                                                                                                                                                                                                                             |
| V6_space  | forestfrac_log10                | Logarithm of forestfrac                                                                                                                                                                                                                                                                                                                                                                                                                                                                                                                                                                                                                                                                          |
| V7_space  | forestfrac_in50kha              | First calculated at 1-km resolution: Average of forestfrac across the surrounding 23x23 km box.                                                                                                                                                                                                                                                                                                                                                                                                                                                                                                                                                                                                  |
| V8_space  | forestfrac_in50kha_log10        | Logarithm of forestfrac_in50kha                                                                                                                                                                                                                                                                                                                                                                                                                                                                                                                                                                                                                                                                  |
| V9_space  | livebiomass_total               | Sum aboveground stem, branch, and leaf live biomass density (kg/ha)                                                                                                                                                                                                                                                                                                                                                                                                                                                                                                                                                                                                                              |
| V10_space | livebiomass_total_log10         | Logarithm of livebiomass_total                                                                                                                                                                                                                                                                                                                                                                                                                                                                                                                                                                                                                                                                   |
| V11_space | livebiomass_total_in50kha       | First calculated at 1-km resolution: Average of livebiomass_total across the surrounding 23x23 km box.                                                                                                                                                                                                                                                                                                                                                                                                                                                                                                                                                                                           |
| V12_space | livebiomass_total_in50kha_log10 | Logarithm of livebiomass_total_in50kha                                                                                                                                                                                                                                                                                                                                                                                                                                                                                                                                                                                                                                                           |
| V13_space | deadbiomass_total               | Sum aboveground snag, downed coarse wood, and litter dead biomass density (kg/ha)                                                                                                                                                                                                                                                                                                                                                                                                                                                                                                                                                                                                                |
| V14_space | deadbiomass_total_log10         | Logarithm of deadbiomass_total                                                                                                                                                                                                                                                                                                                                                                                                                                                                                                                                                                                                                                                                   |
| V15_space | deadbiomass_total_in50kha       | First calculated at 1-km resolution: Average of deadbiomass_total across the surrounding 23x23 km box.                                                                                                                                                                                                                                                                                                                                                                                                                                                                                                                                                                                           |
| V16_space | deadbiomass_total_in50kha_log10 | Logarithm of deadbiomass_total_in50kha                                                                                                                                                                                                                                                                                                                                                                                                                                                                                                                                                                                                                                                           |
| V17_space | biomass_total                   | Sum of all aboveground biomass densities from all 6 live and dead pools                                                                                                                                                                                                                                                                                                                                                                                                                                                                                                                                                                                                                          |
| V18_space | biomass_total_log10             | Logarithm of biomass_total                                                                                                                                                                                                                                                                                                                                                                                                                                                                                                                                                                                                                                                                       |
| V19_space | biomass_total_in50kha           | First calculated at 1-km resolution: Average of biomass_total across the surrounding 23x23 km box.                                                                                                                                                                                                                                                                                                                                                                                                                                                                                                                                                                                               |
| V20_space | biomass_total_in50kha_log10     | Logarithm of biomass_total_in50kha                                                                                                                                                                                                                                                                                                                                                                                                                                                                                                                                                                                                                                                               |
| V21_space | livebiomass_coarse              | Sum aboveground stem and branch live biomass density (kg/ha)                                                                                                                                                                                                                                                                                                                                                                                                                                                                                                                                                                                                                                     |
| V22_space | livebiomass_coarse_log10        | Logarithm of livebiomass_coarse                                                                                                                                                                                                                                                                                                                                                                                                                                                                                                                                                                                                                                                                  |

|           |                                    |                                                                                                                                                      |
|-----------|------------------------------------|------------------------------------------------------------------------------------------------------------------------------------------------------|
| V23_space | livebiomass_coarse_in50kha         | First calculated at 1-km resolution: Average of livebiomass_coarse across the surrounding 23x23 km box.                                              |
| V24_space | livebiomass_coarse_in50kha_log10   | Logarithm of livebiomass_coarse_in50kha                                                                                                              |
| V25_space | livebiomass_fine                   | Sum aboveground leaf live biomass density (kg/ha)                                                                                                    |
| V26_space | livebiomass_fine_log10             | Logarithm of livebiomass_fine                                                                                                                        |
| V27_space | livebiomass_fine_in50kha           | First calculated at 1-km resolution: Average of livebiomass_fine across the surrounding 23x23 km box.                                                |
| V28_space | livebiomass_fine_in50kha_log10     | Logarithm of livebiomass_fine_in50kha                                                                                                                |
| V29_space | deadbiomass_coarse                 | Sum aboveground snag and downed coarsewood dead biomass density (kg/ha)                                                                              |
| V30_space | deadbiomass_coarse_log10           | Logarithm of deadbiomass_coarse                                                                                                                      |
| V31_space | deadbiomass_coarse_in50kha         | First calculated at 1-km resolution: Average of deadbiomass_coarse across the surrounding 23x23 km box.                                              |
| V32_space | deadbiomass_coarse_in50kha_log10   | Logarithm of deadbiomass_coarse_in50kha                                                                                                              |
| V33_space | deadbiomass_fine                   | Sum aboveground litter dead biomass density (kg/ha)                                                                                                  |
| V34_space | deadbiomass_fine_log10             | Logarithm of deadbiomass_fine                                                                                                                        |
| V35_space | deadbiomass_fine_in50kha           | First calculated at 1-km resolution: Average of deadbiomass_fine across the surrounding 23x23 km box.                                                |
| V36_space | deadbiomass_fine_in50kha_log10     | Logarithm of deadbiomass_fine_in50kha                                                                                                                |
| V37_space | cohort_dbh                         | Mean live tree diameter at breast height (cm)                                                                                                        |
| V38_space | cohort_dbh_log10                   | Logarithm of cohort_dbh                                                                                                                              |
| V39_space | cohort_dbh_in50kha                 | First calculated at 1-km resolution: Average of cohort_dbh across the surrounding 23x23 km box.                                                      |
| V40_space | cohort_dbh_in50kha_log10           | Logarithm of cohort_dbh_in50kha                                                                                                                      |
| V41_space | cohort_height                      | Mean live tree height (m)                                                                                                                            |
| V42_space | cohort_height_log10                | Logarithm of cohort_height                                                                                                                           |
| V43_space | cohort_height_in50kha              | First calculated at 1-km resolution: Average of cohort_height across the surrounding 23x23 km box.                                                   |
| V44_space | cohort_height_in50kha_log10        | Logarithm of cohort_height_in50kha                                                                                                                   |
| V45_space | spi_17to6monthsbefore_grass_shrub  | 12-month standardized precipitation index (SPI) covering the period 17-6 months ago multiplied by the fraction of area classified as grass or shrub  |
| V46_space | spi_23to12monthsbefore_grass_shrub | 12-month standardized precipitation index (SPI) covering the period 23-12 months ago multiplied by the fraction of area classified as grass or shrub |
| V47_space | spi_29to18monthsbefore_grass_shrub | 12-month standardized precipitation index (SPI) covering the period 29-18 months ago multiplied by the fraction of area classified as grass or shrub |
| V48_space | spi_35to24monthsbefore_grass_shrub | 12-month standardized precipitation index (SPI) covering the period 35-24 months ago multiplied by the fraction of area classified as grass or shrub |
| V49_space | unburnable                         | Fraction of area classified by annual NLCD as water/ice, wetland, or barren                                                                          |
| V50_space | unburnable_log10                   | Logarithm of unburnable                                                                                                                              |

|           |                           |                                                                                                                                                |
|-----------|---------------------------|------------------------------------------------------------------------------------------------------------------------------------------------|
| V51_space | unburnable_in50kha        | First calculated at 1-km resolution: Average of unburnable across the surrounding 23x23 km box.                                                |
| V52_space | unburnable_in50kha_log10  | Logarithm of unburnable_in50kha                                                                                                                |
| V53_space | agriculture               | Fraction of area classified by annual NLCD as cultivated, pasture, or developed open space                                                     |
| V54_space | agriculture_log10         | Logarithm of agriculture                                                                                                                       |
| V55_space | agriculture_in50kha       | First calculated at 1-km resolution: Average of agriculture across the surrounding 23x23 km box.                                               |
| V56_space | agriculture_in50kha_log10 | Logarithm of agriculture_in50kha                                                                                                               |
| V57_space | developed                 | Fraction of area classified by annual NLCD as developed: low, medium, or high intensity                                                        |
| V58_space | developed_log10           | Logarithm of developed                                                                                                                         |
| V59_space | developed_in50kha         | First calculated at 1-km resolution: Average of developed across the surrounding 23x23 km box.                                                 |
| V60_space | developed_in50kha_log10   | Logarithm of developed_in50kha                                                                                                                 |
| V61_space | slope                     | Average of topographic slope calculated at 1-km (degrees)                                                                                      |
| V62_space | slope_log10               | Logarithm of slope                                                                                                                             |
| V63_space | elevstd                   | Standard deviation of 1-km elevation values (m)                                                                                                |
| V64_space | elevstd_log10             | Logarithm of elevstd                                                                                                                           |
| V65_space | aridityindex              | Average aridity index: 12-month precipitation total divided by 12-month reference evapotranspiration total (reference ET from Penman-Monteith) |
| V66_space | aridityindex_log10        | Logarithm of aridityindex                                                                                                                      |
| V67_space | hdwimaxann                | Average maximum daily Hot-Dry-Windy Index of each year                                                                                         |
| V68_space | hdwimaxann_log10          | Logarithm of hdwimaxann                                                                                                                        |
| V69_space | fm1000                    | Long-term average of 1000-hour dead fuel moisture calculated from the National Fire Danger Rating System method                                |
| V70_space | fm1000_log10              | Logarithm of fm1000                                                                                                                            |
| V71_space | fm100                     | Long-term average of 100-hour dead fuel moisture calculated from the National Fire Danger Rating System method                                 |
| V72_space | fm100_log10               | Logarithm of fm100                                                                                                                             |
| V73_space | seasindex                 | Seasonality index: annual average difference between the maximum and minimum 3-month aridity index values divided by the 3-month maximum       |
| V74_space | seasindex_log10           | Logarithm of seasindex                                                                                                                         |
| V75_space | lightning                 | Long-term average lightning frequency calculated from National Lightning Data Network                                                          |
| V76_space | lightning_log10           | Logarithm of lightning                                                                                                                         |
| V77_space | housedensity              | Density of housing units according to SILVIS data                                                                                              |
| V78_space | housedensity_log10        | Logarithm of housedensity                                                                                                                      |
| V79_space | housedensity_in50kha      | First calculated at 1-km resolution: Average of housedensity across the surrounding 23x23 km box.                                              |

|           |                            |                                                                                                                                                              |
|-----------|----------------------------|--------------------------------------------------------------------------------------------------------------------------------------------------------------|
| V80_space | housedensity_in50kha_log10 | Logarithm of housedensity_in50kha                                                                                                                            |
| V81_space | dist5hpkkm                 | Average distance to nearest 1-km grid cell with housing density of $\geq 5$ units per km <sup>2</sup>                                                        |
| V82_space | dist5hpkkm_log10           | Logarithm of dist5hpkkm                                                                                                                                      |
| V83_space | dist50hpkkm                | Average distance to nearest 1-km grid cell with housing density of $\geq 50$ units per km <sup>2</sup>                                                       |
| V84_space | dist50hpkkm_log10          | Logarithm of dist50hpkkm                                                                                                                                     |
| V85_space | fracsnow_1month            | Fraction of days in the current month with >1 mm snow-water equivalent, averaged across 4-km grid cells                                                      |
| V86_space | fracsnow_log10_1month      | Logarithm of fracsnow_1month                                                                                                                                 |
| V87_space | fracsnow_1monthafter       | Fraction of days in the next month with >1 mm snow-water equivalent, averaged across 4-km grid cells                                                         |
| V88_space | fracsnow_log10_1monthafter | Logarithm of fracsnow_1monthafter                                                                                                                            |
| V89_space | swemean_1month             | Mean snow-water equivalent (mm) in the current month averaged across 4-km grid cells                                                                         |
| V90_space | swemean_log10_1month       | Logarithm of swemean_1month                                                                                                                                  |
| V91_space | swemean_1monthafter        | Mean snow-water equivalent (mm) in the next month averaged across 4-km grid cells                                                                            |
| V92_space | swemean_log10_1monthafter  | Logarithm of swemean_1monthafter                                                                                                                             |
| V93_space | roaddist_major             | Mean distance (km) of all 1-km grid cells to the nearest road classified as a Highway or Primary road by the 2013 global gROADSv1 road map                   |
| V94_space | roaddist_major_log10       | Logarithm of roaddist_major                                                                                                                                  |
| V95_space | roaddist_minor             | Mean distance (km) of all 1-km grid cells to the nearest road classified as anything except for Highway or Primary road by the 2013 global gROADSv1 road map |
| V96_space | roaddist_minor_log10       | Logarithm of roaddist_minor                                                                                                                                  |
| V97_space | roaddist_all               | Mean distance (km) of all 1-km grid cells to the nearest road of any time according to the 2013 global gROADSv1 road map                                     |
| V98_space | roaddist_all_log10         | Logarithm of roaddist_all                                                                                                                                    |

**Table S2.** Descriptions of the potential predictor variables considered in building the mean annual cycle component of the fire probability and/or size models (see Table A2).

| Number   | Name                                 | Description                                                                                                              |
|----------|--------------------------------------|--------------------------------------------------------------------------------------------------------------------------|
| V1_seas  | aridityindex_mean_scaled_1month      | Long-term mean annual cycle of single-month aridity index (P/ETo), scaled from 0-1                                       |
| V2_seas  | aridityindex_mean_scaled_2month      | Long-term mean annual cycle of 2-month aridity index (P/ETo), scaled from 0-1                                            |
| V3_seas  | aridityindex_mean_scaled_3month      | Long-term mean annual cycle of 3-month aridity index (P/ETo), scaled from 0-1                                            |
| V4_seas  | aridityindex_mean_scaled_1monthafter | Long-term mean annual cycle of single-month aridity index (P/ETo) of the next month, scaled from 0-1                     |
| V5_seas  | prec_mean_scaled_1month              | Long-term mean annual cycle of 1-month precipitation total, scaled from 0-1                                              |
| V6_seas  | prec_mean_scaled_2month              | Long-term mean annual cycle of 2-month precipitation total, scaled from 0-1                                              |
| V7_seas  | prec_mean_scaled_3month              | Long-term mean annual cycle of 3-month precipitation total, scaled from 0-1                                              |
| V8_seas  | prec_mean_scaled_1monthafter         | Long-term mean annual cycle of 1-month precipitation total of the next month, scaled from 0-1                            |
| V9_seas  | wetdays_mean_scaled_1month           | Long-term mean annual cycle of 1-month frequency of wet days (>2.54 mm precipitation), scaled from 0-1                   |
| V10_seas | wetdays_mean_scaled_2month           | Long-term mean annual cycle of 2-month frequency of wet days (>2.54 mm precipitation), scaled from 0-1                   |
| V11_seas | wetdays_mean_scaled_3month           | Long-term mean annual cycle of 3-month frequency of wet days (>2.54 mm precipitation), scaled from 0-1                   |
| V12_seas | wetdays_mean_scaled_1monthafter      | Long-term mean annual cycle of 1-month frequency of wet days (>2.54 mm precipitation) of the next month, scaled from 0-1 |
| V13_seas | vpd_mean_scaled_1month               | Long-term mean annual cycle of 1-month mean VPD, scaled from 0-1                                                         |
| V14_seas | vpd_mean_scaled_2month               | Long-term mean annual cycle of 2-month mean VPD, scaled from 0-1                                                         |
| V15_seas | vpd_mean_scaled_3month               | Long-term mean annual cycle of 3-month mean VPD, scaled from 0-1                                                         |
| V16_seas | vpd_mean_scaled_1monthafter          | Long-term mean annual cycle of 1-month mean VPD of the next month, scaled from 0-1                                       |
| V17_seas | solar_mean_scaled_1month             | Long-term mean annual cycle of 1-month mean downward solar radiatoin at the surface, scaled from 0-1                     |
| V18_seas | solar_mean_scaled_2month             | Long-term mean annual cycle of 2-month mean downward solar radiatoin at the surface, scaled from 0-1                     |
| V19_seas | solar_mean_scaled_3month             | Long-term mean annual cycle of 3-month mean downward solar radiatoin at the surface, scaled from 0-1                     |
| V20_seas | solar_mean_scaled_1monthafter        | Long-term mean annual cycle of 1-month mean downward solar radiatoin at the surface of the next month, scaled from 0-1   |
| V21_seas | cape_mean_scaled_1month              | Long-term mean annual cycle of 1-month convective available potential energy (CAPE), scaled from 0-1                     |
| V22_seas | lightning_mean_scaled_1month         | Long-term mean annual cycle of 1-month lightning frequency, scaled from 0-1                                              |
| V23_seas | hdwi_mean_scaled_1month              | Long-term mean annual cycle of 1-month Hot-Dry-Windy Index (HDWI), scaled from 0-1                                       |

|          |                                     |                                                                                                                          |
|----------|-------------------------------------|--------------------------------------------------------------------------------------------------------------------------|
| V24_seas | hdwi_mean_scaled_1monthafter        | Long-term mean annual cycle of 1-month Hot-Dry-Windy Index (HDWI) for the next month, scaled from 0-1                    |
| V25_seas | hdwi_max1day_scaled_1month          | Long-term mean annual cycle of 1-month highest single-day Hot-Dry-Windy Index (HDWI), scaled from 0-1                    |
| V26_seas | hdwi_max1day_scaled_1monthafter     | Long-term mean annual cycle of 1-month highest single-day Hot-Dry-Windy Index (HDWI) for the next month, scaled from 0-1 |
| V27_seas | hdwi_max3day_scaled_1month          | Long-term mean annual cycle of 1-month highest 3-day mean Hot-Dry-Windy Index (HDWI), scaled from 0-1                    |
| V28_seas | hdwi_max3day_scaled_1monthafter     | Long-term mean annual cycle of 1-month highest 3-day mean Hot-Dry-Windy Index (HDWI) for the next month, scaled from 0-1 |
| V29_seas | aridityindex_log10_mean_1month      | Logarithm of long-term mean 1-month aridity index                                                                        |
| V30_seas | aridityindex_log10_mean_2month      | Logarithm of long-term mean 2-month aridity index                                                                        |
| V31_seas | aridityindex_log10_mean_3month      | Logarithm of long-term mean 3-month aridity index                                                                        |
| V32_seas | aridityindex_log10_mean_1monthafter | Logarithm of long-term mean 1-month aridity index for the next month                                                     |
| V33_seas | fm1000_mean_scaled_1month           | Long-term mean annual cycle of 1-month 1000-hour dead fuel moisture content, scaled from 0-1                             |
| V34_seas | fm1000_mean_scaled_1monthafter      | Long-term mean annual cycle of 1-month 1000-hour dead fuel moisture content for the next month, scaled from 0-1          |
| V35_seas | fm100_mean_scaled_1month            | Long-term mean annual cycle of 1-month 100-hour dead fuel moisture content, scaled from 0-1                              |
| V36_seas | fm100_mean_scaled_1monthafter       | Long-term mean annual cycle of 1-month 100-hour dead fuel moisture content for the next month, scaled from 0-1           |
| V37_seas | prec_log10_mean_1month              | Logarithm of long-term mean 1-month precipitation total (mm)                                                             |
| V38_seas | prec_log10_mean_2month              | Logarithm of long-term mean 2-month precipitation total (mm)                                                             |
| V39_seas | prec_log10_mean_3month              | Logarithm of long-term mean 3-month precipitation total (mm)                                                             |
| V40_seas | prec_log10_mean_1monthafter         | Logarithm of long-term mean 1-month precipitation total (mm) for the next month                                          |
| V41_seas | wetdays_mean_1month                 | Long-term mean annual cycle of 1-month wet-day frequency (fraction days with >2.54 mm)                                   |
| V42_seas | wetdays_mean_2month                 | Long-term mean annual cycle of 2-month wet-day frequency (fraction days with >2.54 mm)                                   |
| V43_seas | wetdays_mean_3month                 | Long-term mean annual cycle of 3-month wet-day frequency (fraction days with >2.54 mm)                                   |
| V44_seas | wetdays_mean_1monthafter            | Long-term mean annual cycle of 1-month wet-day frequency (fraction days with >2.54 mm) for next month                    |
| V45_seas | vpd_mean_1month                     | Long-term mean annual cycle of 1-month mean VPD (hPa)                                                                    |
| V46_seas | vpd_mean_2month                     | Long-term mean annual cycle of 2-month mean VPD (hPa)                                                                    |
| V47_seas | vpd_mean_3month                     | Long-term mean annual cycle of 3-month mean VPD (hPa)                                                                    |
| V48_seas | vpd_mean_1monthafter                | Long-term mean annual cycle of 1-month mean VPD (hPa) of the next month                                                  |
| V49_seas | solar_mean_1month                   | Long-term mean annual cycle of 1-month mean downward solar radiation at the surface (W/m2)                               |
| V50_seas | solar_mean_2month                   | Long-term mean annual cycle of 2-month mean downward solar radiation at the surface (W/m2)                               |

|          |                                |                                                                                                              |
|----------|--------------------------------|--------------------------------------------------------------------------------------------------------------|
| V51_seas | solar_mean_3month              | Long-term mean annual cycle of 3-month mean downward solar radiation at the surface (W/m2)                   |
| V52_seas | solar_mean_1monthafter         | Long-term mean annual cycle of 1-month mean downward solar radiation at the surface (W/m2) of the next month |
| V53_seas | cape_mean_1month               | Long-term mean annual cycle of 1-month convective available potential energy (CAPE)                          |
| V54_seas | lightning_mean_1month          | Long-term mean annual cycle of 1-month lightning frequency                                                   |
| V55_seas | hdwi_mean_1month               | Long-term mean annual cycle of 1-month Hot-Dry-Windy Index (HDWI)                                            |
| V56_seas | hdwi_mean_1monthafter          | Long-term mean annual cycle of 1-month Hot-Dry-Windy Index (HDWI) for the next month                         |
| V57_seas | hdwi_max1day_1month            | Long-term mean annual cycle of 1-month highest single-day Hot-Dry-Windy Index (HDWI)                         |
| V58_seas | hdwi_max1day_1monthafter       | Long-term mean annual cycle of 1-month highest single-day Hot-Dry-Windy Index (HDWI) for the next month      |
| V59_seas | hdwi_max3day_1month            | Long-term mean annual cycle of 1-month highest 3-day mean Hot-Dry-Windy Index (HDWI)                         |
| V60_seas | hdwi_max3day_1monthafter       | Long-term mean annual cycle of 1-month highest 3-day mean Hot-Dry-Windy Index (HDWI) for the next month      |
| V61_seas | fm1000_mean_1month             | Long-term mean annual cycle of 1-month 1000-hour dead fuel moisture content (%)                              |
| V62_seas | fm1000_mean_1monthafter        | Long-term mean annual cycle of 1-month 1000-hour dead fuel moisture content for the next month (%)           |
| V63_seas | fm100_mean_1month              | Long-term mean annual cycle of 1-month 100-hour dead fuel moisture content (%)                               |
| V64_seas | fm100_mean_1monthafter         | Long-term mean annual cycle of 1-month 100-hour dead fuel moisture content for the next month (%)            |
| V65_seas | vpdmax_mean_scaled_1month      | Long-term mean annual cycle of 1-month mean daily maximum VPD, scaled from 0-1                               |
| V66_seas | vpdmax_mean_scaled_2month      | Long-term mean annual cycle of 2-month mean daily maximum VPD, scaled from 0-1                               |
| V67_seas | vpdmax_mean_scaled_3month      | Long-term mean annual cycle of 3-month mean daily maximum VPD, scaled from 0-1                               |
| V68_seas | vpdmax_mean_scaled_1monthafter | Long-term mean annual cycle of 1-month mean daily maximum VPD of the next month, scaled from 0-1             |
| V69_seas | vpdmin_mean_scaled_1month      | Long-term mean annual cycle of 1-month mean daily minimum VPD, scaled from 0-1                               |
| V70_seas | vpdmin_mean_scaled_2month      | Long-term mean annual cycle of 2-month mean daily minimum VPD, scaled from 0-1                               |
| V71_seas | vpdmin_mean_scaled_3month      | Long-term mean annual cycle of 3-month mean daily minimum VPD, scaled from 0-1                               |
| V72_seas | vpdmin_mean_scaled_1monthafter | Long-term mean annual cycle of 1-month mean daily minimum VPD of the next month, scaled from 0-1             |
| V73_seas | vpdmax_mean_1month             | Long-term mean annual cycle of 1-month mean daily maximum VPD                                                |
| V74_seas | vpdmax_mean_2month             | Long-term mean annual cycle of 2-month mean daily maximum VPD                                                |
| V75_seas | vpdmax_mean_3month             | Long-term mean annual cycle of 3-month mean daily maximum VPD                                                |
| V76_seas | vpdmax_mean_1monthafter        | Long-term mean annual cycle of 1-month mean daily maximum VPD of the next month                              |

|          |                         |                                                                                 |
|----------|-------------------------|---------------------------------------------------------------------------------|
| V77_seas | vpdmin_mean_1month      | Long-term mean annual cycle of 1-month mean daily minimum VPD                   |
| V78_seas | vpdmin_mean_2month      | Long-term mean annual cycle of 2-month mean daily minimum VPD                   |
| V79_seas | vpdmin_mean_3month      | Long-term mean annual cycle of 3-month mean daily minimum VPD                   |
| V80_seas | vpdmin_mean_1monthafter | Long-term mean annual cycle of 1-month mean daily minimum VPD of the next month |



**Table S3.** Descriptions of the potential predictor variables considered in building the temporal anomaly component of the fire probability and/or size models (see Table A3).

| Number       | Name                     | Description                                                                                                                   |
|--------------|--------------------------|-------------------------------------------------------------------------------------------------------------------------------|
| V1_temporal  | spi_1month               | 1-month standardized precipitation index (standardized anomalies for each of the 12 months)                                   |
| V2_temporal  | spi_2month               | 2-month standardized precipitation index (standardized anomalies for each of the 12 months)                                   |
| V3_temporal  | spi_3month               | 3-month standardized precipitation index (standardized anomalies for each of the 12 months)                                   |
| V4_temporal  | spi_4month               | 4-month standardized precipitation index (standardized anomalies for each of the 12 months)                                   |
| V5_temporal  | spi_5month               | 5-month standardized precipitation index (standardized anomalies for each of the 12 months)                                   |
| V6_temporal  | spi_6month               | 6-month standardized precipitation index (standardized anomalies for each of the 12 months)                                   |
| V7_temporal  | spi_9month               | 9-month standardized precipitation index (standardized anomalies for each of the 12 months)                                   |
| V8_temporal  | spi_12month              | 12-month standardized precipitation index (standardized anomalies for each of the 12 months)                                  |
| V9_temporal  | spi_1monthafter          | 1-month standardized precipitation index of the next month (standardized anomalies for each of the 12 months)                 |
| V10_temporal | spi_17to6monthsbefore    | 12-month standardized precipitation index for the period 17-6 months ago (standardized anomalies for each of the 12 months)   |
| V11_temporal | spi_23to12monthsbefore   | 12-month standardized precipitation index for the period 23-12 months ago (standardized anomalies for each of the 12 months)  |
| V12_temporal | spi_29to18monthsbefore   | 12-month standardized precipitation index for the period 29-18 months ago (standardized anomalies for each of the 12 months)  |
| V13_temporal | spi_35to24monthsbefore   | 12-month standardized precipitation index for the period 35-24 months ago (standardized anomalies for each of the 12 months)  |
| V14_temporal | wetdays_anom_1month      | 1-month wet-day frequency (fraction days with >2.54 mm) (standardized anomalies for each of the 12 months)                    |
| V15_temporal | wetdays_anom_2month      | 2-month wet-day frequency (fraction days with >2.54 mm) (standardized anomalies for each of the 12 months)                    |
| V16_temporal | wetdays_anom_1monthafter | 1-month wet-day frequency (fraction days with >2.54 mm) for the next month (standardized anomalies for each of the 12 months) |
| V17_temporal | vpd_anom_1month          | 1-month VPD (standardized anomalies for each of the 12 months)                                                                |
| V18_temporal | vpd_anom_2month          | 2-month VPD (standardized anomalies for each of the 12 months)                                                                |
| V19_temporal | vpd_anom_3month          | 3-month VPD (standardized anomalies for each of the 12 months)                                                                |
| V20_temporal | vpd_anom_4month          | 4-month VPD (standardized anomalies for each of the 12 months)                                                                |
| V21_temporal | vpd_anom_5month          | 5-month VPD (standardized anomalies for each of the 12 months)                                                                |

|              |                                 |                                                                                                                                 |
|--------------|---------------------------------|---------------------------------------------------------------------------------------------------------------------------------|
| V22_temporal | vpd_anom_6month                 | 6-month VPD (standardized anomalies for each of the 12 months)                                                                  |
| V23_temporal | vpd_anom_9month                 | 9-month VPD (standardized anomalies for each of the 12 months)                                                                  |
| V24_temporal | vpd_anom_12month                | 12-month VPD (standardized anomalies for each of the 12 months)                                                                 |
| V25_temporal | vpd_anom_1monthafter            | 1-month VPD of the next month (standardized anomalies for each of the 12 months)                                                |
| V26_temporal | cape_anom_1month                | 1-month convective available potential energy (standardized anomalies for each of the 12 months)                                |
| V27_temporal | cape_anom_max1day_1month        | 1-month highest daily convective available potential energy (standardized anomalies for each of the 12 months)                  |
| V28_temporal | cape_anom_max3day_1month        | 1-month highest 3-day mean convective available potential energy (standardized anomalies for each of the 12 months)             |
| V29_temporal | hdwi_anom_1month                | 1-month mean Hot-Dry-Windy Index (standardized anomalies for each of the 12 months)                                             |
| V30_temporal | hdwi_anom_1monthafter           | 1-month mean Hot-Dry-Windy Index for next month (standardized anomalies for each of the 12 months)                              |
| V31_temporal | hdwi_anom_max1day_1month        | 1-month highest daily Hot-Dry-Windy Index (standardized anomalies for each of the 12 months)                                    |
| V32_temporal | hdwi_anom_max1day_1monthafter   | 1-month highest daily Hot-Dry-Windy Index for next month (standardized anomalies for each of the 12 months)                     |
| V33_temporal | hdwi_anom_max3day_1month        | 1-month highest 3-day mean Hot-Dry-Windy Index (standardized anomalies for each of the 12 months)                               |
| V34_temporal | hdwi_anom_max3day_1monthafter   | 1-month highest 3-day mean Hot-Dry-Windy Index for next month (standardized anomalies for each of the 12 months)                |
| V35_temporal | fm1000_anom_1month              | 1-month mean 1000-hr dead fuel moisture content (standardized anomalies for each of the 12 months)                              |
| V36_temporal | fm1000_anom_1monthafter         | 1-month mean 1000-hr dead fuel moisture content for next month (standardized anomalies for each of the 12 months)               |
| V37_temporal | fm1000_anom_min3day_1month      | 1-month single-day minimum 1000-hr dead fuel moisture content (standardized anomalies for each of the 12 months)                |
| V38_temporal | fm1000_anom_min3day_1monthafter | 1-month minimum 3-day mean 1000-hr dead fuel moisture content for next month (standardized anomalies for each of the 12 months) |
| V39_temporal | fm100_anom_1month               | 1-month mean 100-hr dead fuel moisture content (standardized anomalies for each of the 12 months)                               |
| V40_temporal | fm100_anom_1monthafter          | 1-month mean 100-hr dead fuel moisture content for next month (standardized anomalies for each of the 12 months)                |
| V41_temporal | fm100_anom_min3day_1month       | 1-month single-day minimum 100-hr dead fuel moisture content (standardized anomalies for each of the 12 months)                 |
| V42_temporal | fm100_anom_min3day_1monthafter  | 1-month minimum 3-day mean 100-hr dead fuel moisture content for next month (standardized anomalies for each of the 12 months)  |
| V43_temporal | vpd_anom_max3day_1month         | 1-month maximum 3-day mean VPD (standardized anomalies for each of the 12 months)                                               |
| V44_temporal | vpd_anom_max3day_1monthafter    | 1-month maximum 3-day mean VPD for next month (standardized anomalies for each of the 12 months)                                |
| V45_temporal | fracsnow_anom_1month            | 1-month anomaly of fraction of days with >1mm snow water equivalent (anomaly for each of the 12 months, unstandardized)         |

|              |                                 |                                                                                                                                                    |
|--------------|---------------------------------|----------------------------------------------------------------------------------------------------------------------------------------------------|
| V46_temporal | fracsnow_anom_1monthafter       | 1-month anomaly of fraction of days with >1mm snow water equivalent for next month (anomaly for each of the 12 months, unstandardized)             |
| V47_temporal | swemax_last12months_anom        | Anomaly of maximum single-day snow-water equivalent of the past 12 months including this month (anomaly for each of the 12 months, unstandardized) |
| V48_temporal | swemax_last12months             | Maximum single-day snow-water equivalent of the past 12 months including this month (mm)                                                           |
| V49_temporal | fracsnow_1month                 | 1-month fraction of days with >2.54 mm snow-water equivalent                                                                                       |
| V50_temporal | fracsnow_log10_1month           | Logarithm of 1-month fraction of days with >2.54 mm snow-water equivalent                                                                          |
| V51_temporal | fracsnow_1monthafter            | 1-month fraction of days with >2.54 mm snow-water equivalent for next month                                                                        |
| V52_temporal | fracsnow_log10_1monthafter      | Logarithm of 1-month fraction of days with >2.54 mm snow-water equivalent for next month                                                           |
| V53_temporal | swemean_1month                  | 1-month snow-water equivalent (mm)                                                                                                                 |
| V54_temporal | swemean_log10_1month            | Logarithm of 1-month snow-water equivalent (mm)                                                                                                    |
| V55_temporal | swemean_1monthafter             | 1-month snow-water equivalent for next month (mm)                                                                                                  |
| V56_temporal | swemean_log10_1monthafter       | Logarithm of 1-month snow-water equivalent for next month (mm)                                                                                     |
| V57_temporal | vpdmax_anom_1month              | 1-month mean daily maximum VPD (standardized anomalies for each of the 12 months)                                                                  |
| V58_temporal | vpdmax_anom_1monthafter         | 1-month mean daily maximum VPD for next month (standardized anomalies for each of the 12 months)                                                   |
| V59_temporal | vpdmin_anom_1month              | 1-month mean daily minimum VPD (standardized anomalies for each of the 12 months)                                                                  |
| V60_temporal | vpdmin_anom_1monthafter         | 1-month mean daily minimum VPD for next month (standardized anomalies for each of the 12 months)                                                   |
| V61_temporal | vpdmax_anom_max1day_1month      | 1-month single-day maximum of daily maximum VPD (standardized anomalies for each of the 12 months)                                                 |
| V62_temporal | vpdmax_anom_max1day_1monthafter | 1-month single-day maximum of daily maximum VPD for next month (standardized anomalies for each of the 12 months)                                  |
| V63_temporal | vpdmax_anom_max3day_1month      | 1-month maximum 3-day mean of daily maximum VPD (standardized anomalies for each of the 12 months)                                                 |
| V64_temporal | vpdmax_anom_max3day_1monthafter | 1-month maximum 3-day mean of daily maximum VPD for next month (standardized anomalies for each of the 12 months)                                  |
| V65_temporal | vpdmin_anom_max1day_1month      | 1-month single-day maximum of daily minimum VPD (standardized anomalies for each of the 12 months)                                                 |
| V66_temporal | vpdmin_anom_max1day_1monthafter | 1-month single-day maximum of daily minimum VPD for next month (standardized anomalies for each of the 12 months)                                  |
| V67_temporal | vpdmin_anom_max3day_1month      | 1-month maximum 3-day mean of daily minimum VPD (standardized anomalies for each of the 12 months)                                                 |
| V68_temporal | vpdmin_anom_max3day_1monthafter | 1-month maximum 3-day mean of daily minimum VPD for next month (standardized anomalies for each of the 12 months)                                  |
